# Supplementary material
Source: Springer Nature journal article supplement (https://www.springermedizin.de/resource/supplementary/12967_2008_278_MOESM4_ESM.pdf/9576090)
Supplement: MOESM4 [file 9576090]

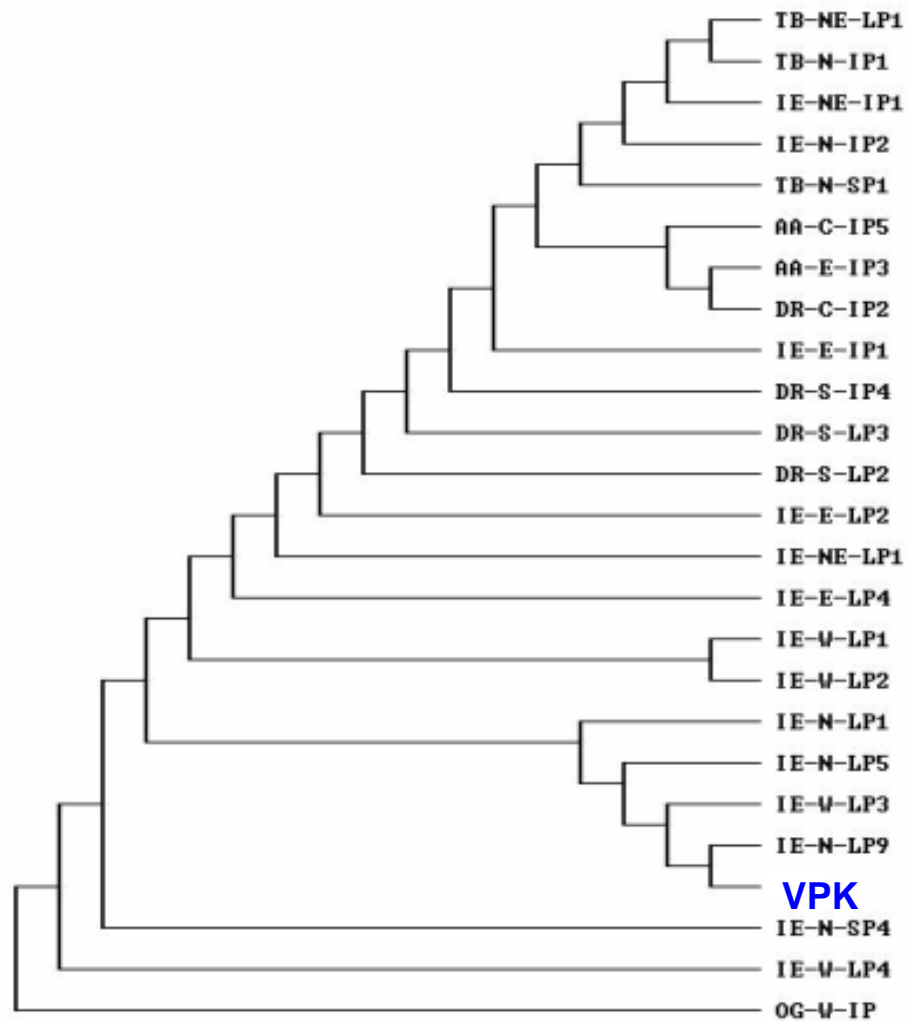

**Additional File 4. Neighbor Joining tree showing relatedness of study population to the Indo European population**
